# Supplementary material for: An automated image-based workflow for detecting megabenthic fauna in optical images with examples from the Clarion–Clipperton Zone
Source: Springer Nature journal article supplement (doi:10.1038/s41598-023-35518-5), 2023-05-23
Supplement: MOESM1 [file 41598_2023_35518_MOESM1_ESM.zip]

# An automated image-based workflow for detecting megabenthic fauna in optical images with examples from the Clarion-Clipperton Zone

Benson Mbani<sup>1\*</sup>, Valentin Buck<sup>1</sup> and Jens Greinert<sup>1,2</sup>

<sup>1</sup>DeepSea Monitoring Group, GEOMAR Helmholtz Center for Ocean Research Kiel, Wischhofstraße 1-3, 24148 Kiel, Germany

<sup>2</sup>Institute of Geosciences, Kiel University, Ludewig-Meyn-Str. 10-12, 24118 Kiel, Germany.

**\* Correspondence:**

Corresponding Author

[bmbani@geomar.de](mailto:bmbani@geomar.de)

**Keywords:** Underwater image analysis, underwater object detection, megafauna detection, image segmentation, superpixels, anomaly detection, ocean floor observation system (OFOS), Clarion-Clipperton Zone (CCZ)

## SUPPLEMENTARY FIGURES

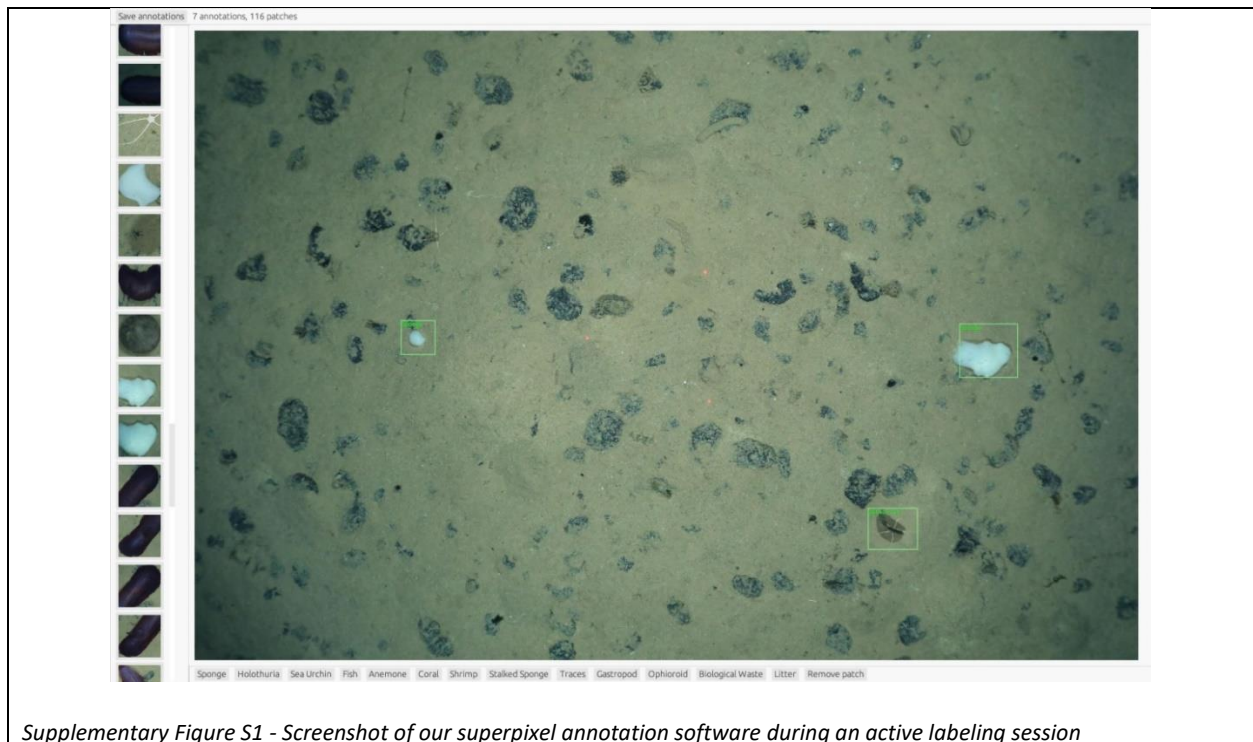

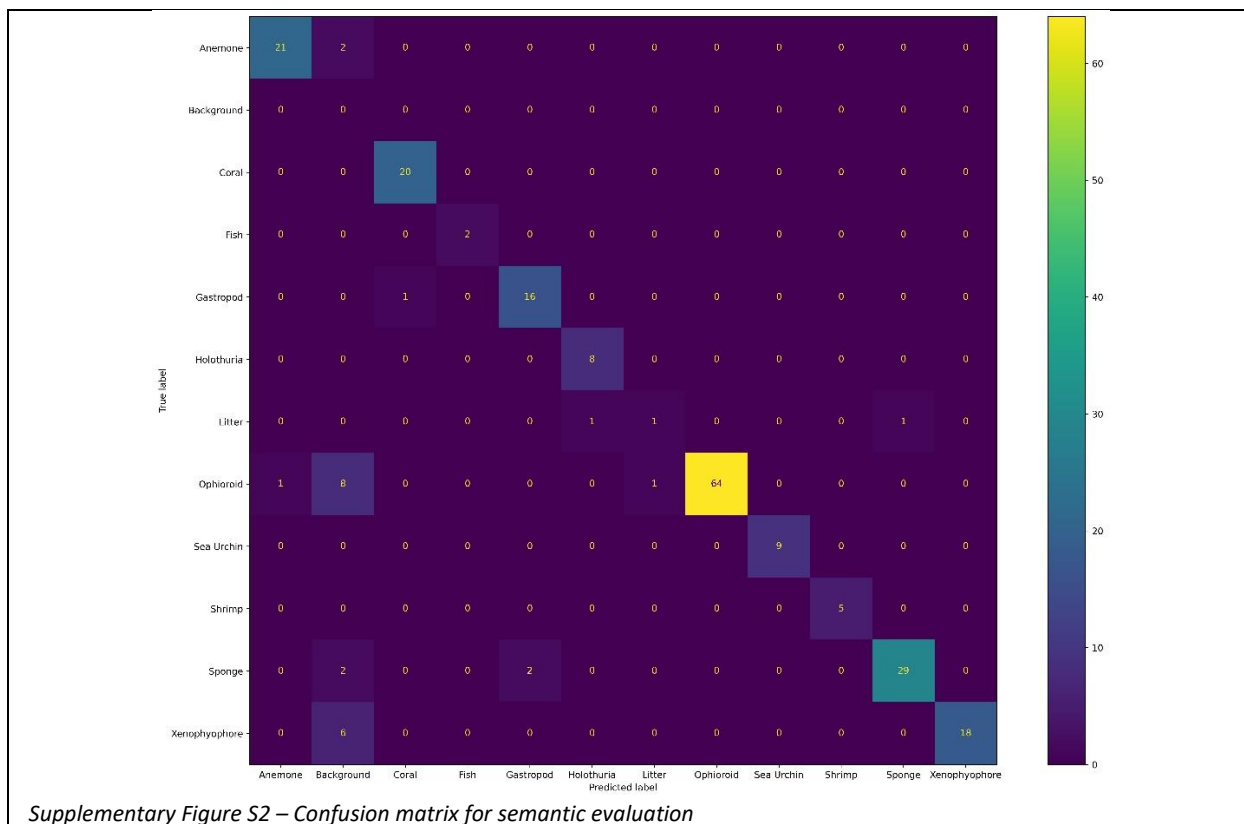

## SUPPLEMENTARY TABLES

Supplementary Table S3 Set of specific python packages (and their description) employed during our software development

| Python Library                         | Usage                                                                  |
|----------------------------------------|------------------------------------------------------------------------|
| <b>pandas</b>                          | Processing navigation text files and managing csv files                |
| <b>geopandas</b>                       | Geotagging images by matching acquisition time vs USBL navigation data |
| <b>contextily</b>                      | Providing basemaps for cartographic visualization on jupyter notebooks |
| <b>tensorflow-gpu</b>                  | Transfer learning and image classification for the binary classifier   |
| <b>cartopy</b>                         | Cartographic visualization on jupyter notebooks                        |
| <b>scikit-learn</b>                    | Machine learning and dimensionality reduction                          |
| <b>ipython</b>                         | Rendering rich text on jupyter notebooks                               |
| <b>shapely</b>                         | Computational geometry                                                 |
| <b>matplotlib</b>                      | Visualization and plotting                                             |
| <b>imageio</b>                         | Reading image datasets into memory                                     |
| <b>seaborn</b>                         | Visualization and plotting on top of matplotlib                        |
| <b>pillow</b>                          | Image processing                                                       |
| <b>rasterio</b>                        | Reading geospatial raster files such as bathymetry, backscatter e.t.c  |
| <b>scikit-image</b>                    | Image processing                                                       |
| <b>Tensorflow object detection API</b> | Training and evaluating the object detection model                     |

Supplementary Table S4 Coco metric categories used for performance evaluation to evaluate the performance of our FaunD-Fast object detection model (for detailed descriptions please see <https://cocodataset.org/#detection-eval> )

| Average Precision (AP) |                                                                          |
|------------------------|--------------------------------------------------------------------------|
| $AP_{.50:.95}$         | % AP at IoU=.50:.05:.95                                                  |
| $AP_{.50}$             | % AP at IoU=.50                                                          |
| $AP_{small}$           | % AP for small objects: area < 32 <sup>2</sup> pixels                    |
| $AP_{medium}$          | % AP for medium objects: 32 <sup>2</sup> < area < 96 <sup>2</sup> pixels |
| $AP_{large}$           | % AP for large objects: area > 96 <sup>2</sup> pixels                    |
| Average Recall (AR)    |                                                                          |
| $AR_1$                 | % AR given 1 detection per image                                         |
| $AR_{10}$              | % AR given 10 detections per image                                       |
| $AR_{100}$             | % AR given 100 detections per image                                      |
| $AR_{small}$           | % AR for small objects: area < 32 <sup>2</sup> pixels                    |
| $AR_{medium}$          | % AR for medium objects: 32 <sup>2</sup> < area < 96 <sup>2</sup> pixels |
| $AR_{large}$           | % AR for large objects: area > 96 <sup>2</sup> pixels                    |

## CONFIGURATION FILES

### Configuration settings for training the Faster R-CNN model

# Faster R-CNN with Resnet-50 (v1)  
# Trained on COCO, initialized from Imagenet classification checkpoint

```
model {
  faster_rcnn {
    num_classes: 11
    image_resizer {
      fixed_shape_resizer {
        width: 1680
        height: 1120
      }
    }
    feature_extractor {
      type: 'faster_rcnn_resnet101_keras'
      batch_norm_trainable: true
    }
    first_stage_anchor_generator {
      grid_anchor_generator {
        scales: [0.25, 0.5, 1.0, 2.0]
        aspect_ratios: [0.5, 1.0, 2.0]
        height_stride: 16
        width_stride: 16
      }
    }
    first_stage_box_predictor_conv_hyperparams {
      op: CONV
      regularizer {
        l2_regularizer {
          weight: 0.0
        }
      }
      initializer {
        truncated_normal_initializer {
          stddev: 0.01
        }
      }
    }
  }
}
```

```

    }
    first_stage_nms_score_threshold: 0.0
    first_stage_nms_iou_threshold: 0.7
    first_stage_max_proposals: 300
    first_stage_localization_loss_weight: 2.0
    first_stage_objectness_loss_weight: 1.0
    initial_crop_size: 14
    maxpool_kernel_size: 2
    maxpool_stride: 2
    second_stage_box_predictor {
      mask_rcnn_box_predictor {
        use_dropout: true
        dropout_keep_probability: 0.8
        fc_hyperparams {
          op: FC
          regularizer {
            l2_regularizer {
              weight: 0.0
            }
          }
          initializer {
            variance_scaling_initializer {
              factor: 1.0
              uniform: true
              mode: FAN_AVG
            }
          }
        }
      }
      share_box_across_classes: true
    }
  }
  second_stage_post_processing {
    batch_non_max_suppression {
      score_threshold: 0.0
      iou_threshold: 0.6
      max_detections_per_class: 100
      max_total_detections: 300
    }
    score_converter: SOFTMAX
  }
  second_stage_localization_loss_weight: 2.0
  second_stage_classification_loss_weight: 1.0
  use_static_shapes: true
  use_matmul_crop_and_resize: true
  clip_anchors_to_image: true
  use_static_balanced_label_sampler: true
  use_matmul_gather_in_matcher: true
}

train_config: {
  batch_size: 1
  sync_replicas: true
  startup_delay_steps: 0
  replicas_to_aggregate: 8
  num_steps: 100000
  optimizer {
    momentum_optimizer: {
      learning_rate: {
        cosine_decay_learning_rate {
          learning_rate_base: .04
          total_steps: 100000
          warmup_learning_rate: .013333
          warmup_steps: 2000
        }
      }
    }
  }
}

```

```

        momentum_optimizer_value: 0.9
    }
    use_moving_average: false
}
gradient_clipping_by_norm: 10.0
fine_tune_checkpoint_version: V2
fine_tune_checkpoint:
"~/fauna_detection_with_tensorflow_object_detection_api/my_model_dir/faster_rcnn_resnet101_v1_102
4x1024_coco17_tpu-8/checkpoint/ckpt-0"
fine_tune_checkpoint_type: "detection"
data_augmentation_options {
    random_horizontal_flip {
    }
}

data_augmentation_options {
    random_adjust_hue {
    }
}

data_augmentation_options {
    random_adjust_contrast {
    }
}

data_augmentation_options {
    random_adjust_saturation {
    }
}

max_number_of_boxes: 100
unpad_groundtruth_tensors: false
use_bfloat16: false # works only on TPUs
}
train_input_reader: {
    label_map_path:
"~/fauna_detection_with_tensorflow_object_detection_api/data/SO268_label_map.pbtxt"
    tf_record_input_reader {
        input_path: "~/fauna_detection_with_tensorflow_object_detection_api/data/train.tfrecord"
    }
}

eval_config: {
    metrics_set: "coco_detection_metrics"
    use_moving_averages: false
    max_evals: 100
    batch_size: 1;
}

eval_input_reader: {
    label_map_path:
"~/fauna_detection_with_tensorflow_object_detection_api/data/SO268_label_map.pbtxt"
    shuffle: false
    num_epochs: 10
    tf_record_input_reader {
        input_path: "~/fauna_detection_with_tensorflow_object_detection_api/data/validation.tfrecord"
    }
}

```

### **Configuration settings for training the Faster R-CNN model**

```
from pathlib import Path
```

```
DIRECTORY_CONTAINING_IMAGE_DATASET = Path('~/.underwater_image_dataset_for_fauna_detection/')
PROJECT_DIRECTORY = Path.cwd().parent

UNSUPERVISED_LEARNING_DIR = PROJECT_DIRECTORY / 'data/unsupervised_outlier_detection/'

DIVE_TO_DETECT_ANOMALIES = 'SO268-1_021-1_OFOS-02' #Specify the folder name

DIVE_PARENT_IMAGES_DIR = DIRECTORY_CONTAINING_IMAGE_DATASET / f'{DIVE_TO_DETECT_ANOMALIES}'

DIVE_WORKING_DIR = UNSUPERVISED_LEARNING_DIR / f'{DIVE_TO_DETECT_ANOMALIES}'

DIVE_SAMPLED_BACKGROUND_IMAGES_DIR = DIVE_WORKING_DIR / 'background_images'

DIVE_PICKLED_ITEMS_DIR = DIVE_WORKING_DIR / 'pickled_items'

DIVE_OUTPUT_DIR = DIVE_WORKING_DIR / 'detection_outputs'

NUMBER_OF_IMAGES_TO_SAMPLE_AS_BACKGROUND = 500

BATCH_SIZE = 32

LATENT_DIMENSION = 100

TRAINING_EPOCHS = 20

CONTAMINATION = 0.01

SUPERVISED_LEARNING_DIR = PROJECT_DIRECTORY / 'data/supervised_fauna_non_fauna_classification/'

DIVE_OUTPUT_DIR_AFTER_BINARY_CLASSIFICATION = SUPERVISED_LEARNING_DIR / 'classification_outputs/'

ANNOTATION_TOOL_DIR = PROJECT_DIRECTORY / 'custom_annotation_tool/'

OBJECT_DETECTION_DIR = PROJECT_DIRECTORY / 'fauna_detection_with_tensorflow_object_detection_api'

EXAMPLE_DIVE = DIVE_TO_DETECT_ANOMALIES

PATH_TO_EXAMPLE_DIVE = UNSUPERVISED_LEARNING_DIR / f'{EXAMPLE_DIVE}'

EXAMPLE_DIRECTORY_WITH_PICKLED_ITEMS = PATH_TO_EXAMPLE_DIVE / 'pickled_items'

MANUSCRIPT_FIGURES_DIRECTORY = PATH_TO_EXAMPLE_DIVE / 'manuscript_figures'

MANUSCRIPT_FIG_SIZE = (12,8)

DETECTION_PATCHES_DIRECTORY = PATH_TO_EXAMPLE_DIVE / 'detection_patches'
```
